# Supplementary material for: Silver Nanoparticles Induced Changes in DNA Methylation and Histone H3 Methylation in a Mouse Model of Breast Cancer
Source: MDPI journal article supplement (doi:10.3390/ma16114163), 2023-06-02
Supplement: s1 [file s1]

Supplementary Table S1. Expression of chromatin modification enzymes at the mRNA level in tumors from mice treated intragastrically or intravenously with citrate- or PEG-coated AgNPs. Rq- mean expression level relative to control. Statistically significant changes relative to control are highlighted.

| Target Name | Intragastric administration |                  |           |                  | Intravenous administration |                  |           |                  |
|-------------|-----------------------------|------------------|-----------|------------------|----------------------------|------------------|-----------|------------------|
|             | AgNPs citrate               |                  | AgNPs PEG |                  | AgNPs citrate              |                  | AgNPs PEG |                  |
|             | Rq                          | P-Value (t-test) | Rq        | P-Value (t-test) | Rq                         | P-Value (t-test) | Rq        | P-Value (t-test) |
| Ash1l       | 1.053                       | 0.222            | 0.845     | 0.476            | 0.702                      | 0.107            | 0.747     | 0.348            |
| Atf2        | 1.115                       | 0.374            | 0.940     | 0.768            | 0.776                      | 0.202            | 0.892     | 0.632            |
| Aurka       | 1.008                       | 0.969            | 1.211     | 0.690            | 1.322                      | 0.490            | 1.212     | 0.627            |
| Aurkb       | 0.956                       | 0.815            | 0.933     | 0.876            | 1.285                      | 0.441            | 1.024     | 0.951            |
| Carm1       | 1.015                       | 0.838            | 0.955     | 0.688            | 0.812                      | 0.154            | 0.891     | 0.676            |
| Cdyl        | 0.904                       | 0.251            | 0.933     | 0.522            | 0.972                      | 0.859            | 0.957     | 0.823            |
| Ciita       | 1.989                       | 0.116            | 1.326     | 0.660            | 1.366                      | 0.711            | 2.469     | 0.347            |
| Csrp2bp     | 1.134                       | 0.077            | 0.881     | 0.566            | 0.880                      | 0.624            | 1.183     | 0.562            |
| Dnmt1       | 0.875                       | 0.258            | 0.611     | 0.005            | 1.096                      | 0.902            | 0.665     | 0.026            |
| Dnmt3a      | 1.170                       | 0.617            | 2.293     | 0.132            | 0.870                      | 0.734            | 1.620     | 0.302            |
| Dnmt3b      | 0.915                       | 0.550            | 0.608     | 0.073            | 0.736                      | 0.549            | 1.119     | 0.815            |
| Dot1l       | 0.945                       | 0.695            | 0.863     | 0.560            | 0.794                      | 0.165            | 0.731     | 0.164            |
| Dzip3       | 1.140                       | 0.418            | 0.877     | 0.630            | 0.826                      | 0.319            | 0.698     | 0.208            |
| Ehmt1       | 0.981                       | 0.886            | 0.701     | 0.144            | 0.618                      | 0.271            | 0.730     | 0.437            |
| Ehmt2       | 0.956                       | 0.613            | 0.871     | 0.437            | 0.681                      | 0.339            | 0.823     | 0.578            |
| Esco1       | 1.244                       | 0.228            | 2.102     | 0.156            | 1.112                      | 0.156            | 1.563     | 0.077            |
| Esco2       | 0.954                       | 0.701            | 0.588     | 0.015            | 1.473                      | 0.181            | 0.697     | 0.312            |
| Hat1        | 0.943                       | 0.553            | 0.633     | 0.054            | 1.019                      | 0.845            | 0.714     | 0.009            |
| Hdac1       | 0.987                       | 0.859            | 0.406     | 0.439            | 0.804                      | 0.251            | 0.843     | 0.260            |
| Hdac10      | 1.528                       | 0.382            | 2.969     | 0.234            | 1.150                      | 0.688            | 2.406     | 0.148            |
| Hdac11      | 1.329                       | 0.375            | 1.221     | 0.412            | 0.654                      | 0.477            | 1.188     | 0.778            |
| Hdac2       | 0.923                       | 0.204            | 0.864     | 0.380            | 0.746                      | 0.255            | 0.689     | 0.182            |
| Hdac3       | 0.950                       | 0.540            | 0.816     | 0.089            | 0.795                      | 0.093            | 0.855     | 0.486            |
| Hdac4       | 1.105                       | 0.396            | 0.961     | 0.815            | 0.710                      | 0.132            | 0.987     | 0.951            |
| Hdac5       | 1.234                       | 0.046            | 1.235     | 0.330            | 0.710                      | 0.011            | 0.796     | 0.180            |
| Hdac6       | 0.918                       | 0.204            | 0.795     | 0.273            | 0.707                      | 0.107            | 0.777     | 0.286            |
| Hdac7       | 1.120                       | 0.581            | 1.062     | 0.828            | 0.890                      | 0.609            | 1.271     | 0.287            |
| Hdac8       | 1.157                       | 0.285            | 0.925     | 0.778            | 0.821                      | 0.457            | 1.255     | 0.375            |
| Hdac9       | 1.303                       | 0.548            | 0.909     | 0.772            | 1.206                      | 0.762            | 2.563     | 0.221            |
| Kat2a       | 1.048                       | 0.688            | 0.944     | 0.790            | 0.722                      | 0.236            | 0.798     | 0.479            |
| Kat2b       | 1.302                       | 0.331            | 2.717     | 0.134            | 0.861                      | 0.427            | 1.472     | 0.203            |
| Kat5        | 1.061                       | 0.518            | 1.537     | 0.280            | 0.813                      | 0.330            | 1.074     | 0.741            |
| Kdm1a       | 0.842                       | 0.031            | 0.783     | 0.100            | 0.745                      | 0.196            | 0.762     | 0.281            |
| Kdm4a       | 0.901                       | 0.421            | 0.746     | 0.140            | 0.633                      | 0.353            | 0.849     | 0.692            |
| Kdm4c       | 1.095                       | 0.165            | 0.985     | 0.921            | 0.758                      | 0.226            | 0.813     | 0.340            |

|          |       |       |       |       |       |       |       |       |
|----------|-------|-------|-------|-------|-------|-------|-------|-------|
| Kdm5b    | 1.077 | 0.042 | 1.265 | 0.237 | 0.644 | 0.027 | 0.849 | 0.636 |
| Kdm5c    | 1.239 | 0.099 | 0.964 | 0.883 | 0.870 | 0.479 | 1.190 | 0.359 |
| Kdm6b    | 1.118 | 0.451 | 0.956 | 0.734 | 0.547 | 0.126 | 0.726 | 0.246 |
| Mll3     | 1.098 | 0.530 | 0.946 | 0.807 | 0.710 | 0.460 | 1.133 | 0.784 |
| Mll5     | 1.109 | 0.547 | 1.101 | 0.767 | 0.759 | 0.140 | 0.839 | 0.508 |
| Mysm1    | 1.090 | 0.377 | 0.825 | 0.404 | 0.704 | 0.053 | 0.795 | 0.239 |
| Myst2    | 0.885 | 0.100 | 0.737 | 0.104 | 0.751 | 0.189 | 0.688 | 0.141 |
| Myst3    | 1.241 | 0.001 | 0.935 | 0.858 | 0.770 | 0.265 | 0.842 | 0.484 |
| Myst4    | 0.985 | 0.477 | 0.944 | 0.781 | 0.621 | 0.231 | 0.797 | 0.528 |
| Ncoa1    | 1.090 | 0.651 | 1.038 | 0.916 | 0.686 | 0.180 | 1.185 | 0.594 |
| Ncoa3    | 1.172 | 0.290 | 1.139 | 0.682 | 0.946 | 0.889 | 1.441 | 0.367 |
| Ncoa6    | 1.115 | 0.161 | 0.974 | 0.871 | 0.758 | 0.075 | 0.730 | 0.074 |
| Nek6     | 1.173 | 0.200 | 0.992 | 0.982 | 0.700 | 0.203 | 0.826 | 0.666 |
| Nsd1     | 1.007 | 0.969 | 0.770 | 0.241 | 0.835 | 0.684 | 1.108 | 0.824 |
| Pak1     | 1.081 | 0.592 | 0.854 | 0.486 | 1.032 | 0.915 | 0.770 | 0.268 |
| Prmt1    | 0.860 | 0.146 | 1.189 | 0.517 | 0.906 | 0.258 | 0.907 | 0.440 |
| Prmt2    | 1.112 | 0.355 | 1.001 | 0.992 | 0.720 | 0.165 | 0.732 | 0.436 |
| Prmt3    | 0.938 | 0.654 | 0.711 | 0.096 | 0.830 | 0.508 | 0.721 | 0.117 |
| Prmt5    | 0.937 | 0.249 | 0.716 | 0.099 | 0.897 | 0.251 | 0.728 | 0.159 |
| Prmt6    | 1.147 | 0.541 | 2.382 | 0.162 | 0.830 | 0.310 | 1.258 | 0.324 |
| Prmt7    | 1.006 | 0.958 | 0.847 | 0.265 | 0.827 | 0.398 | 0.892 | 0.680 |
| Prmt8    | 1.088 | 0.817 | 2.057 | 0.142 | 0.299 | 0.148 | 0.824 | 0.845 |
| Rnf2     | 0.986 | 0.903 | 0.973 | 0.834 | 0.777 | 0.123 | 0.782 | 0.264 |
| Rnf20    | 1.098 | 0.508 | 0.878 | 0.517 | 0.837 | 0.315 | 1.005 | 0.973 |
| Rps6ka3  | 1.003 | 0.961 | 0.889 | 0.577 | 0.904 | 0.307 | 1.043 | 0.756 |
| Rps6ka5  | 1.186 | 0.131 | 0.932 | 0.698 | 0.731 | 0.115 | 0.837 | 0.377 |
| Setd1a   | 1.053 | 0.816 | 0.557 | 0.454 | 0.790 | 0.292 | 0.846 | 0.466 |
| Setd1b   | 0.995 | 0.980 | 0.584 | 0.484 | 0.584 | 0.175 | 0.782 | 0.559 |
| Setd2    | 1.061 | 0.299 | 0.814 | 0.512 | 0.712 | 0.141 | 0.791 | 0.325 |
| Setd4    | 1.116 | 0.552 | 0.664 | 0.006 | 0.816 | 0.715 | 0.923 | 0.879 |
| Setd5    | 0.956 | 0.651 | 0.835 | 0.386 | 0.730 | 0.200 | 0.836 | 0.460 |
| Setd6    | 1.053 | 0.808 | 1.769 | 0.221 | 0.830 | 0.359 | 1.240 | 0.317 |
| Setd7    | 0.999 | 0.998 | 0.709 | 0.185 | 0.632 | 0.404 | 0.637 | 0.410 |
| Setd8    | 0.894 | 0.374 | 0.810 | 0.193 | 0.967 | 0.868 | 0.797 | 0.270 |
| Setdb1   | 1.157 | 0.026 | 0.758 | 0.318 | 0.691 | 0.055 | 0.728 | 0.251 |
| Setdb2   | 1.134 | 0.300 | 0.786 | 0.291 | 1.081 | 0.497 | 1.211 | 0.609 |
| Smyd1    | 1.013 | 0.985 | 0.580 | 0.636 | 3.149 | 0.288 | 2.147 | 0.401 |
| Smyd3    | 1.317 | 0.042 | 0.852 | 0.482 | 0.685 | 0.111 | 0.955 | 0.855 |
| Suv39h1  | 0.920 | 0.562 | 0.634 | 0.031 | 0.946 | 0.806 | 0.778 | 0.265 |
| Suv420h1 | 1.307 | 0.148 | 0.855 | 0.739 | 0.698 | 0.016 | 0.921 | 0.730 |
| Tbp      | 1.011 | 0.915 | 0.838 | 0.327 | 0.816 | 0.289 | 0.864 | 0.479 |
| Ube2a    | 1.043 | 0.516 | 0.713 | 0.373 | 0.826 | 0.409 | 0.794 | 0.271 |
| Ube2b    | 1.244 | 0.043 | 0.504 | 0.514 | 0.708 | 0.452 | 0.867 | 0.687 |

|       |       |       |       |       |       |       |       |       |
|-------|-------|-------|-------|-------|-------|-------|-------|-------|
| Usp16 | 1.181 | 0.184 | 0.594 | 0.453 | 0.750 | 0.179 | 0.931 | 0.740 |
| Usp21 | 1.245 | 0.320 | 2.462 | 0.121 | 0.844 | 0.669 | 1.679 | 0.167 |
| Usp22 | 0.852 | 0.017 | 0.908 | 0.346 | 0.699 | 0.031 | 0.654 | 0.229 |
| Whsc1 | 0.922 | 0.221 | 0.736 | 0.034 | 0.859 | 0.065 | 0.589 | 0.023 |

Supplementary Table S2. Expression of oncogenes and tumor suppressor genes at the mRNA level in tumors from mice treated intragastrically with citrate- or PEG-coated AgNPs. Rq- mean expression level relative to control. Statistically significant changes relative to control are highlighted.

| Target Name | AgNPs citrate |                  | AgNPs PEG |                  |
|-------------|---------------|------------------|-----------|------------------|
|             | Rq            | P-Value (t-test) | Rq        | P-Value (t-test) |
| Abl1        | 0.920         | 0.169            | 0.852     | 0.097            |
| Akt1        | 0.856         | 0.288            | 0.785     | 0.024            |
| Apc         | 1.192         | 0.160            | 0.782     | 0.471            |
| Atm         | 1.289         | 0.198            | 0.775     | 0.244            |
| Bax         | 0.977         | 0.818            | 1.023     | 0.920            |
| Bcl2        | 1.282         | 0.579            | 2.508     | 0.074            |
| Bcl2l1      | 0.922         | 0.707            | 1.013     | 0.972            |
| Bcr         | 1.061         | 0.651            | 0.940     | 0.681            |
| Brca1       | 0.762         | 0.085            | 0.443     | 0.029            |
| Brca2       | 0.711         | 0.147            | 0.555     | 0.028            |
| Casp8       | 1.068         | 0.321            | 0.985     | 0.970            |
| Ccnd1       | 0.836         | 0.021            | 0.752     | 0.167            |
| Cdh1        | 0.938         | 0.931            | 0.811     | 0.664            |
| Cdk4        | 0.902         | 0.244            | 1.107     | 0.647            |
| Cdkn1a      | 0.993         | 0.982            | 1.196     | 0.699            |
| Cdkn3       | 0.942         | 0.748            | 0.565     | 0.130            |
| Ctnnb1      | 0.896         | 0.387            | 1.071     | 0.800            |
| E2f1        | 0.973         | 0.738            | 0.705     | 0.067            |
| Elk1        | 0.808         | 0.533            | 0.940     | 0.839            |
| ErbB2       | 1.215         | 0.506            | 1.288     | 0.351            |
| Esr1        | 0.956         | 0.835            | 0.916     | 0.709            |
| Ets1        | 1.134         | 0.331            | 0.759     | 0.292            |
| Fos         | 0.415         | 0.106            | 1.191     | 0.758            |
| Foxd3       | 1.839         | 0.548            | 5.677     | 0.167            |
| Hgf         | 1.530         | 0.385            | 1.387     | 0.570            |
| Hic1        | 1.378         | 0.672            | 3.369     | 0.168            |
| Hras1       | 2.375         | 0.447            | 7.008     | 0.175            |
| Igf2r       | 1.112         | 0.454            | 1.079     | 0.508            |
| Jak2        | 1.317         | 0.462            | 1.040     | 0.825            |
| Jun         | 0.902         | 0.711            | 1.348     | 0.377            |
| Junb        | 1.061         | 0.865            | 1.975     | 0.297            |
| Jund        | 1.650         | 0.538            | 3.647     | 0.180            |
| Kit         | 1.111         | 0.658            | 1.377     | 0.135            |
| Kitl        | 1.353         | 0.308            | 1.219     | 0.549            |
| Kras        | 0.914         | 0.126            | 0.901     | 0.230            |
| Mcl1        | 1.066         | 0.177            | 1.056     | 0.497            |
| Mdm2        | 0.886         | 0.469            | 0.777     | 0.061            |

|          |       |       |       |       |
|----------|-------|-------|-------|-------|
| Men1     | 0.900 | 0.675 | 0.831 | 0.316 |
| Met      | 0.879 | 0.096 | 0.650 | 0.053 |
| Mgmt     | 1.114 | 0.426 | 1.343 | 0.060 |
| MLh1     | 0.972 | 0.845 | 0.630 | 0.035 |
| Mos      | 2.791 | 0.419 | 7.898 | 0.178 |
| Myb      | 1.254 | 0.645 | 0.467 | 0.023 |
| Myc      | 1.154 | 0.294 | 1.066 | 0.826 |
| Mycn     | 2.309 | 0.152 | 1.832 | 0.257 |
| Nf1      | 1.087 | 0.096 | 0.891 | 0.431 |
| Nf2      | 0.880 | 0.201 | 0.793 | 0.106 |
| Nfkb1    | 0.945 | 0.691 | 0.721 | 0.378 |
| Nfkbia   | 1.029 | 0.912 | 0.954 | 0.867 |
| Nras     | 0.964 | 0.841 | 0.821 | 0.183 |
| Pik3c2a  | 1.084 | 0.402 | 1.038 | 0.810 |
| Pik3ca   | 1.115 | 0.476 | 1.039 | 0.865 |
| Pml      | 1.187 | 0.107 | 0.895 | 0.519 |
| Prkca    | 1.075 | 0.514 | 1.033 | 0.856 |
| Raf1     | 1.031 | 0.476 | 0.893 | 0.234 |
| Rara     | 0.621 | 0.258 | 1.244 | 0.641 |
| Rassf1   | 0.990 | 0.950 | 1.198 | 0.281 |
| Rb1      | 1.038 | 0.796 | 0.986 | 0.918 |
| Rel      | 1.254 | 0.161 | 0.953 | 0.600 |
| Ret      | 0.837 | 0.508 | 0.624 | 0.361 |
| Runx1    | 1.017 | 0.792 | 1.186 | 0.059 |
| Runx3    | 0.770 | 0.268 | 0.622 | 0.093 |
| S100a4   | 0.922 | 0.248 | 0.500 | 0.111 |
| Serpinb5 | 0.391 | 0.451 | 0.702 | 0.768 |
| Sh3pxd2a | 0.893 | 0.388 | 0.920 | 0.722 |
| Smad4    | 1.067 | 0.539 | 0.882 | 0.509 |
| Src      | 0.890 | 0.037 | 0.903 | 0.567 |
| Stat3    | 1.122 | 0.449 | 1.227 | 0.208 |
| Stk11    | 1.015 | 0.720 | 1.045 | 0.870 |
| Tbp      | 0.983 | 0.900 | 0.850 | 0.547 |
| Tgfb1    | 1.036 | 0.507 | 0.949 | 0.749 |
| Tnf      | 2.101 | 0.435 | 5.841 | 0.180 |
| Trp53    | 0.698 | 0.212 | 0.731 | 0.288 |
| Tsc1     | 1.211 | 0.430 | 1.038 | 0.793 |
| Vhl      | 0.916 | 0.499 | 0.703 | 0.060 |
| Wt1      | 0.753 | 0.530 | 0.808 | 0.720 |
| Wwox     | 0.742 | 0.069 | 0.752 | 0.297 |
| Xrcc1    | 0.792 | 0.336 | 1.172 | 0.519 |
| Zhx2     | 1.220 | 0.292 | 0.989 | 0.974 |
